# Supplementary material for: Impacts of climate change and climate extremes on major crops productivity in China at a global warming of 1.5 and 2.0 °C
Source: Copernicus journal article supplement (doi:10.5194/esd-9-543-2018), 2018-05-18
Supplement: Supplementary file 1 [file esd-9-543-2018-supplement.pdf]

Supplement of Earth Syst. Dynam., 9, 543–562, 2018  
<https://doi.org/10.5194/esd-9-543-2018-supplement>  
© Author(s) 2018. This work is distributed under  
the Creative Commons Attribution 4.0 License.

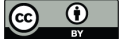

*Supplement of*

## **Impacts of climate change and climate extremes on major crops productivity in China at a global warming of 1.5 and 2.0 °C**

**Yi Chen et al.**

*Correspondence to:* Fulu Tao (taofl@igsnr.ac.cn)

The copyright of individual parts of the supplement might differ from the CC BY 4.0 License.

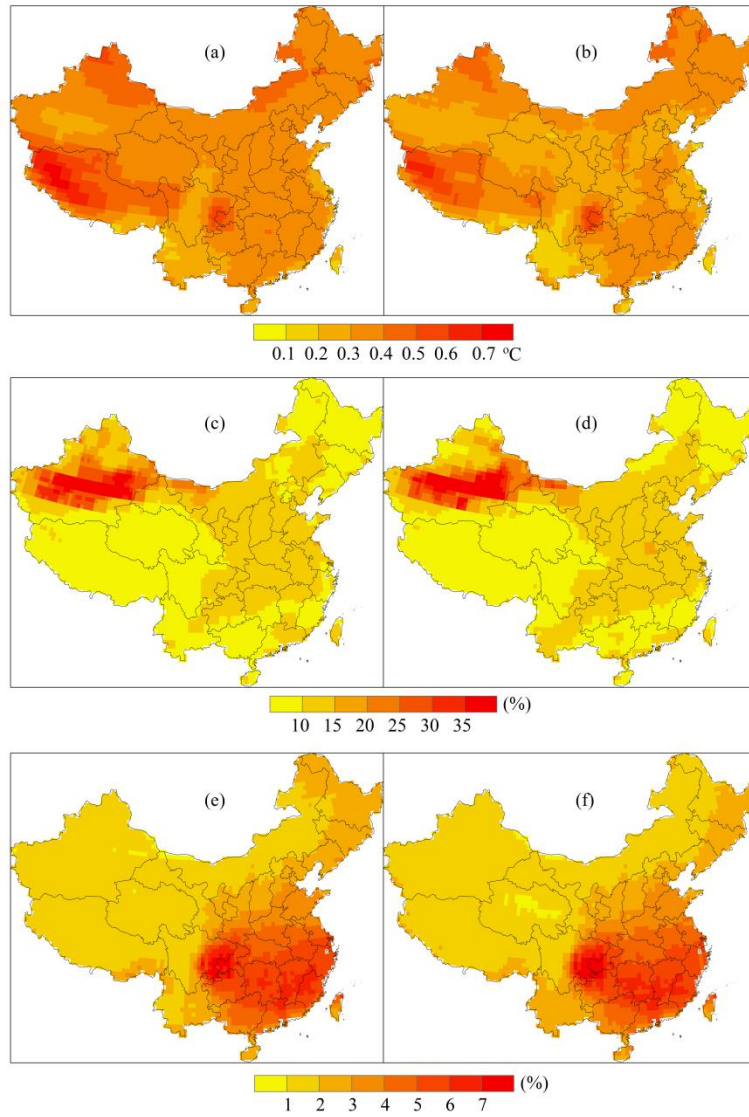

**Figure S1: Standard deviation of projected changes in mean temperature (a, b), precipitation (c, d), and solar radiation (e, f) during 2106-2115 under 1.5°C warming (a, c, e) and 2.0°C warming (b, d, f) scenarios relative to 2006-2015.**

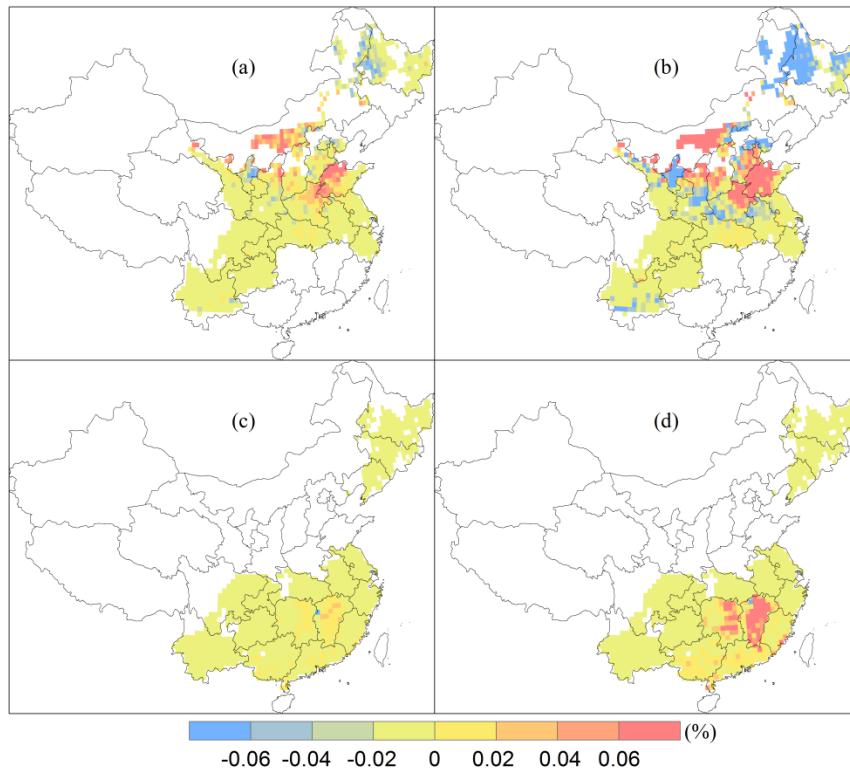

**Figure S2. (a) Differences between Fig. 7a and Fig. 7c; (b) Differences between Fig. 7b and Fig. 7d; (c) Differences between Fig. 7e and Fig. 7g; (d) Differences between Fig. 7f and Fig. 7h.**

5

10

15

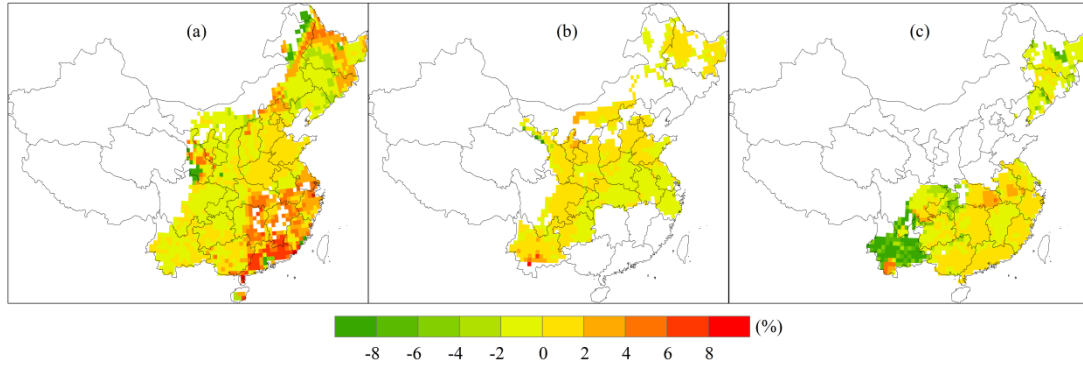

Figure S3. Changes in variation coefficient of simulated yields between 1.5°C and 2.0°C warming scenarios for maize (a), wheat (b) and rice (c).

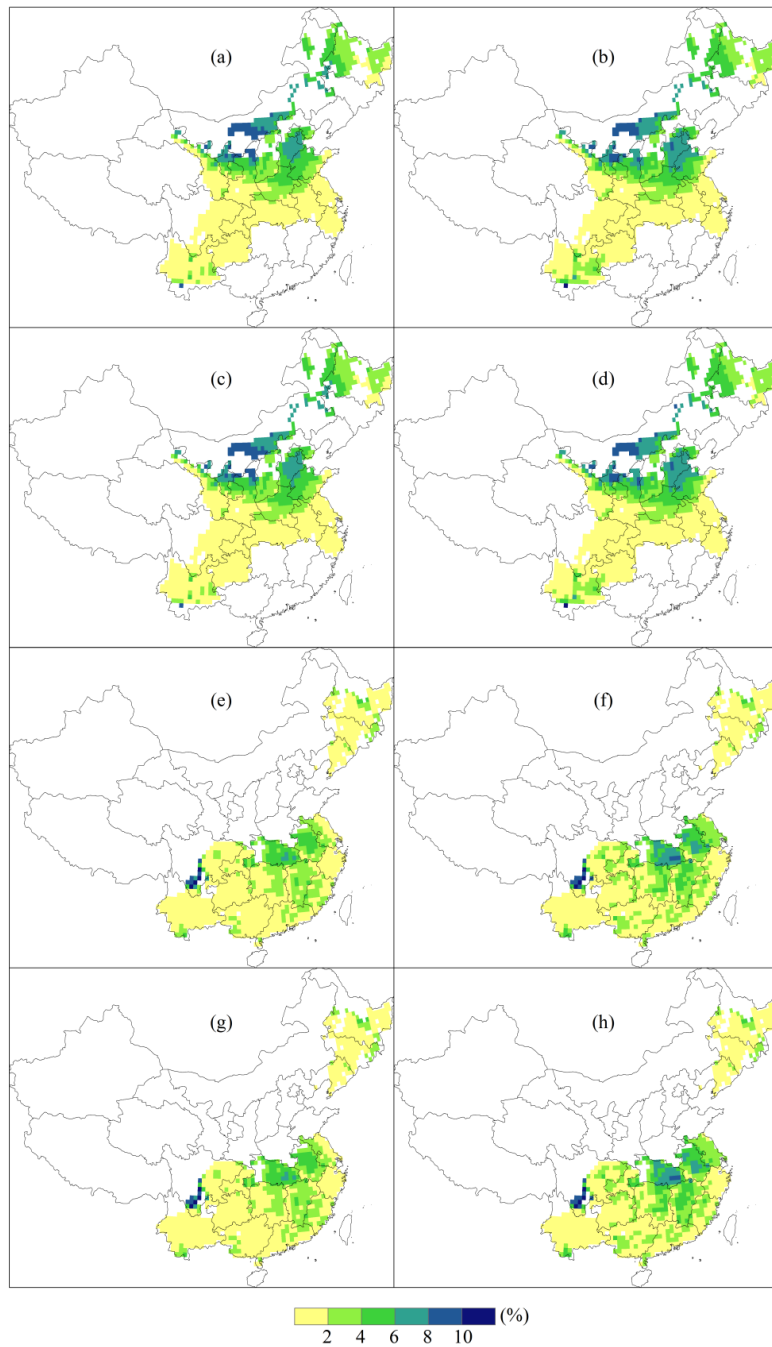

**Figure S4.** Standard deviation of changes in projected yield loss caused by heat stress for wheat (a, b, c, d) and maize (e, f, g, h) during 2106-2115 under 1.5°C warming (a, c, e, g) and 2.0°C warming scenarios (b, d, f, h) relative to 2006-2015, without (a, b, e, f) and with (c, d, g, h) CO<sub>2</sub> fertilization effect.

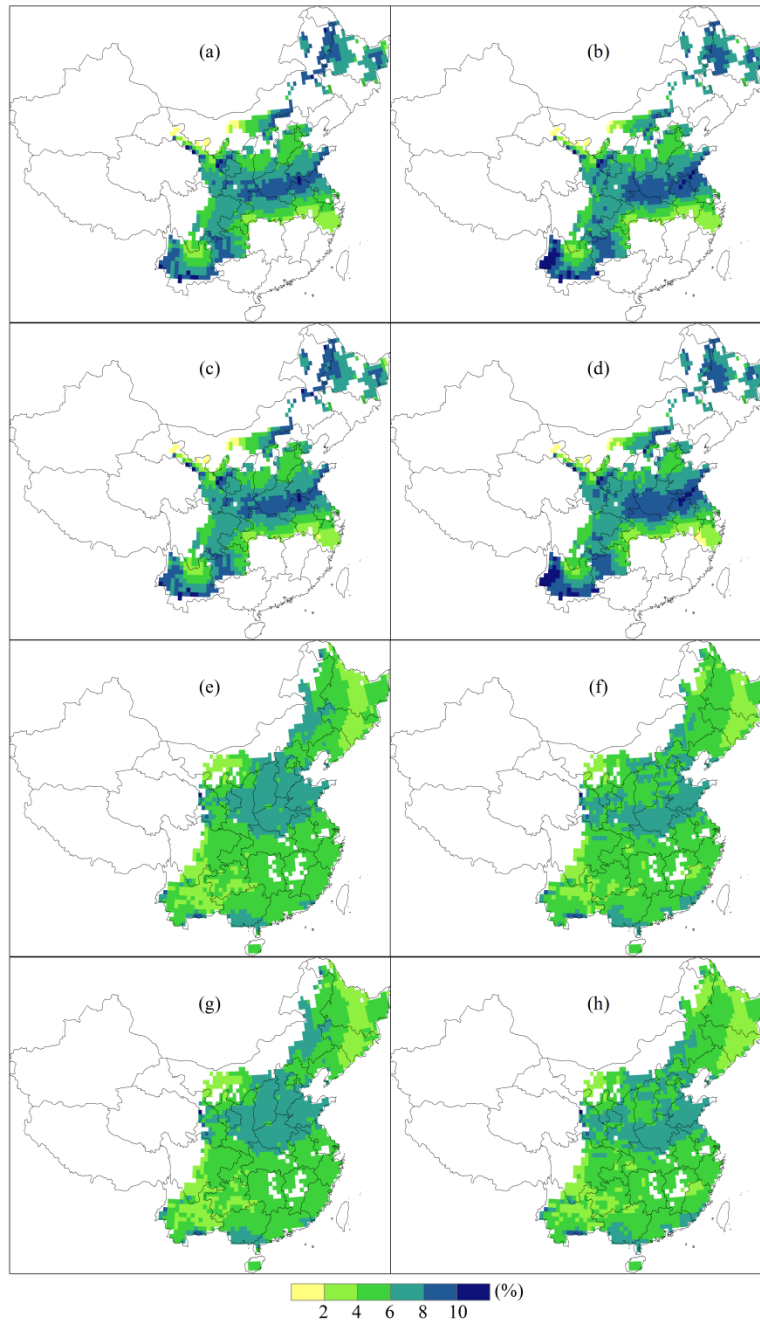

Figure S5. Standard deviation of changes in projected yield loss caused by drought stress for wheat (a, b, c, d) and maize (e, f, g, h) during 2106-2115 under 1.5°C warming (a, c, e, g) and 2.0°C warming scenarios (b, d, f, h) relative to 2006-2015, without (a, b, e, f) and with (c, d, g, h) CO<sub>2</sub> fertilization effect.
